# Supplementary material for: Microstructural constraints on magmatic mushes under Kīlauea Volcano, Hawaiʻi
Source: Springer Nature journal article supplement (doi:10.1038/s41467-019-13635-y), 2020-01-07
Supplement: MOESM2 [file 41467_2019_13635_MOESM2_ESM.pdf]

**Supplementary Information: Microstructural Constraints on Magmatic Mushes under  
Kīlauea Volcano, Hawai'i**

Penny E. Wieser<sup>\*1</sup>, Marie Edmonds<sup>1</sup>, John Maclennan<sup>1</sup> and John Wheeler<sup>2</sup>

<sup>1</sup>Department of Earth Sciences, University of Cambridge, Downing Street, Cambridge, UK,  
CB2 3EQ.

<sup>2</sup>Department of Earth, Ocean and Ecological Sciences, University of Liverpool.

\* Corresponding author: [pew26@cam.ac.uk](mailto:pew26@cam.ac.uk)

## Supplementary Tables

**Supplementary Table 1** – Spatial and temporal information for the samples used in this study.

| <b>Sample</b> | <b>Eruption Date</b>            | <b>Description</b>                | <b>Location</b> | <b>GPS co-ordinates</b>       |
|---------------|---------------------------------|-----------------------------------|-----------------|-------------------------------|
| KL0909        | May 24 <sup>th</sup> , 1969     | Ep. 1 Mauna Ulu                   | ERZ             | 19° 21.826' N, 155° 12.877' W |
| KL0908        | Dec 30 <sup>th</sup> , 1969     | Ep. 12 Mauna Ulu                  | ERZ             | 19° 20.839' N, 155° 12.518' W |
| KL0910        | Nov 10 <sup>th</sup> , 1973     | Pau'ahi Crater                    | ERZ             | 19° 22.313' N, 155° 13.510' W |
| KL0914        | Sept 24-29 <sup>th</sup> , 1971 |                                   | Intracaldera    | 19° 24.580' N, 155° 16.631' W |
| KL0916        | Aug 14 <sup>th</sup> , 1971     |                                   | Intracaldera    | 19° 24.137' N, 155° 16.644' W |
| KL0917        | Late July, 1974                 |                                   | Intracaldera    | 19° 24.06' N, 155° 16.653' W  |
| KL0919        | Late Dec, 1974                  | Ka'u Desert                       | SSWRZ           | 19° 22.649' N, 155° 17.609' W |
| KL0920        | Late Dec, 1974                  | Ka'u Desert                       | SSWRZ           | 19° 22.603' N, 155° 17.713' W |
| KL0921        | ~1700 AD                        | Circumferential flow, Ka'u Desert | SSWRZ           | 19° 22.989' N, 155° 17.464' W |
| KL0922        | Sept 1974                       |                                   | Intracaldera    | 19° 24.201' N, 155° 17.502' W |
| KL0924        | Late July, 1974                 |                                   | Extracaldera    | 19° 24.142' N, 155° 16.896' W |
| KL0930        | 1919-1920                       | Mauna Iki                         | NSWRZ           | 19° 21.230' N, 155° 23.892' W |
| KL0931        | Sept 24-29 <sup>th</sup> , 1971 |                                   | NSWRZ           | 19° 20.625' N, 155° 21.659' W |

**Supplementary Table 2** – EBSD acquisition parameters.

| <b>SEM Settings</b> |              | <b>EBSD Settings</b>     |                                                     |
|---------------------|--------------|--------------------------|-----------------------------------------------------|
| Aperture            | 3            | Sample-Detector Distance | ~14 mm                                              |
| Voltage             | 20 kV        | Background (frames)      | 2                                                   |
| Beam Size           | 5.5          | Gain                     | 10-30                                               |
| Sample Tilt         | 70°          | Hough Resolution         | 60                                                  |
| Working Distance    | ~17-14 mm    | Band Detection (min/max) | Min 6<br>max 12                                     |
| Step size (um)      | 3-15 $\mu$ m | Reference                | Forsterite (Fe 0.2 MgO 1.8)<br>AMSDB-ID:<br>0008912 |
|                     |              | EBSP resolution          | 320x240 pixels                                      |

**Supplementary Table 3** – Calibration materials, count times, and estimates of analytical precision and accuracy for EPMA analysis of olivine crystals. Precision and accuracy was estimated from repeated measurements of a San Carlos Olivine secondary standard. Some instrument drift occurred in session 2. We only report forsterite contents from this session (forsterite contents measured in repeated analyses of San Carlos olivine were used to create a linear interpolation model to correct instrument drift). The drift was less coherent for Si and Ca, so these elements are not reported. Ca contents for run 1 and 3 were internally corrected to the values measured in the San Carlos olivine standard (factors of 1.3 and 1.05 respectively).

| Element                                                                                    | Calibration       | Crystal   | Peak Count time | Analysis order  | Condition | Precision (%) (Std dev/mean) | Accuracy (%) (measured / standard) |
|--------------------------------------------------------------------------------------------|-------------------|-----------|-----------------|-----------------|-----------|------------------------------|------------------------------------|
| Session 1 – 30nA, 15kV. November, 2017                                                     |                   |           |                 |                 |           |                              |                                    |
| Si                                                                                         | Diopside          | TAP       | 10s             | 1 <sup>st</sup> | N/A       | 0.49                         | 99.0                               |
| Mg                                                                                         | St. Johns Olivine | TAP       | 20s             | 2 <sup>nd</sup> | N/A       | 1.16                         | 97.7                               |
| Fe                                                                                         | Fayalite          | LIF       | 20s             | 1 <sup>st</sup> | N/A       | 1.07                         | 99.3                               |
| Ca                                                                                         | Diopside          | LPET      | 60s             | 1 <sup>st</sup> | N/A       | 9.3                          | 130.7                              |
| Session 1 – February 2018 – Dual condition run<br>Cond1 = 30nA, 15kV; Cond 2 = 100nA, 15kV |                   |           |                 |                 |           |                              |                                    |
| Si                                                                                         | Diopside          | TAP       | 10s             | 1 <sup>st</sup> | 1         | 1.12                         | 99.26                              |
| Mg                                                                                         | St. Johns Olivine | TAP       | 20s             | 2 <sup>nd</sup> | 1         | 2.41                         | 100.30                             |
| Fe                                                                                         | Fayalite          | LIF       | 20s             | 1 <sup>st</sup> | 1         | 1.14                         | 98.47                              |
| Ca                                                                                         | Diopside          | LPET      | 10s             | 1 <sup>st</sup> | 2         | 12.3                         | 118.0                              |
| Session 3 –40nA, 15kV. March 2018,                                                         |                   |           |                 |                 |           |                              |                                    |
| Si                                                                                         | Diopside          | TAP       | 20s             | 1 <sup>st</sup> | N/A       | 0.67                         | 100.7                              |
| Mg                                                                                         | St. Johns Olivine | LTAP      | 20s             | 1 <sup>st</sup> | N/A       | 0.72                         | 99.9                               |
| Fe                                                                                         | Fayalite          | LIF       | 20s             | 1 <sup>st</sup> | N/A       | 0.93                         | 100.58                             |
| Ca                                                                                         | Diopside          | PET, LPET | 30s, 20s        | 1 <sup>st</sup> | N/A       | 0.93                         | 105.4                              |

**Supplementary Table 4** - Calibration materials and count times for EPMA analyses of matrix glasses.

| Element | Calibration Material | Crystal | Peak Count Time | Analysis order  |
|---------|----------------------|---------|-----------------|-----------------|
| Na      | Jadeite              | LTAP    | 10s             | 1 <sup>st</sup> |
| Al      | Corundum             | LTAP    | 20s             | 2 <sup>nd</sup> |
| Ca      | Diopside             | PET     | 20s             | 1 <sup>st</sup> |
| P       | Apatite              | PET     | 60s             | 2 <sup>nd</sup> |
| K       | K feldspar           | LPET    | 10s             | 1 <sup>st</sup> |
| Ti      | Rutile               | LPET    | 60s             | 2 <sup>nd</sup> |
| Si      | Diopside             | TAP     | 10s             | 1 <sup>st</sup> |
| Mg      | St. Johns Olivine    | TAP     | 20s             | 2 <sup>nd</sup> |

|    |           |     |     |                 |
|----|-----------|-----|-----|-----------------|
| Fe | Fayalite  | LIF | 20s | 1 <sup>st</sup> |
| Cr | Cr spinel | LIF | 40s | 2 <sup>nd</sup> |
| Mn | Manganese | LIF | 40s | 3 <sup>rd</sup> |

**Supplementary Table 5** - Precision and accuracy for EPMA analyses of matrix glasses and melt inclusions. Precision and accuracy was estimated from repeated measurements of VG2 and Basalt\_113716-1 secondary standards.

| Element                                            | SiO <sub>2</sub> | Mg<br>O | Al <sub>2</sub> O <sub>3</sub> | Ca<br>O | TiO <sub>2</sub> | FeO       | Cr <sub>2</sub> O<br>3 | MnO       | Na <sub>2</sub><br>O | K <sub>2</sub> O | P <sub>2</sub> O <sub>5</sub> |
|----------------------------------------------------|------------------|---------|--------------------------------|---------|------------------|-----------|------------------------|-----------|----------------------|------------------|-------------------------------|
| % Accuracy<br>BCR                                  | 98.3             | 98.3    | 101.<br>5                      | 99.2    | 101.<br>2        | 100.<br>7 | 279.<br>5              | 85.1      | 101.<br>9            | 99.<br>8         | 84.9                          |
| % Precision<br>BCR                                 | 1.5              | 1.6     | 1.1                            | 1.7     | 2.3              | 2.7       | 115.<br>8              | 15.8      | 6.4                  | 11.<br>6         | 20.6                          |
| % Accuracy<br>Indian Ocean<br>Basalt_1137<br>16-1  | 99.2             | 98.5    | 101.<br>7                      | 99.0    | 103.<br>6        | 101.<br>3 | 108.<br>8              | 125.<br>8 | 100.<br>5            | 91.<br>0         | 104.<br>3                     |
| % Precision<br>Indian Ocean<br>Basalt_1137<br>16-1 | 1.4              | 2.2     | 1.7                            | 1.8     | 1.8              | 2.8       | 66.2                   | 15.4      | 2.2                  | 17.<br>1         | 23.4                          |

**Supplementary Table 6**-Details of spectrometers used for WDS EPMA maps.

| Element | Spectrometer |
|---------|--------------|
| Al      | LTAP         |
| Ca      | PET          |
| P       | LPET         |
| Al      | TAP          |
| Fe      | LIF          |

## Supplementary Figures

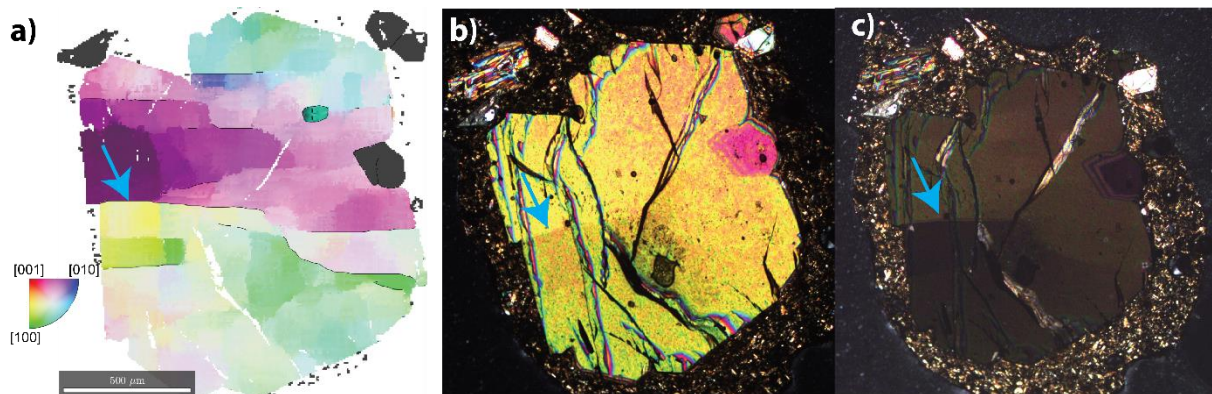

**Supplementary Figure 1**– Comparison of EBSD-derived IPF map (panel **a**; scaled to  $2^\circ$ ) with photos taken using a high-spec optical microscope (panels **b-c**; Zeiss Axioscope A1). Only a small number of the prominent lattice distortions observed in panel **a**) are visible when viewed with an optical microscope (and only within  $5^\circ$  of the extinction position. Additionally, those visible in **c**) when the crystal is close to extinction can only be seen when the brightness is turned all the way up. This shows that unless each grain in a thin section is examined individually (and rotated through  $90^\circ$  while constantly adjusting the brightness and contrast), it is exceptionally easy to miss the presence of intracrystalline distortions. Even when care is taken, only distortions with large misorientations (e.g. purple to yellow colors in **a**) are observed.

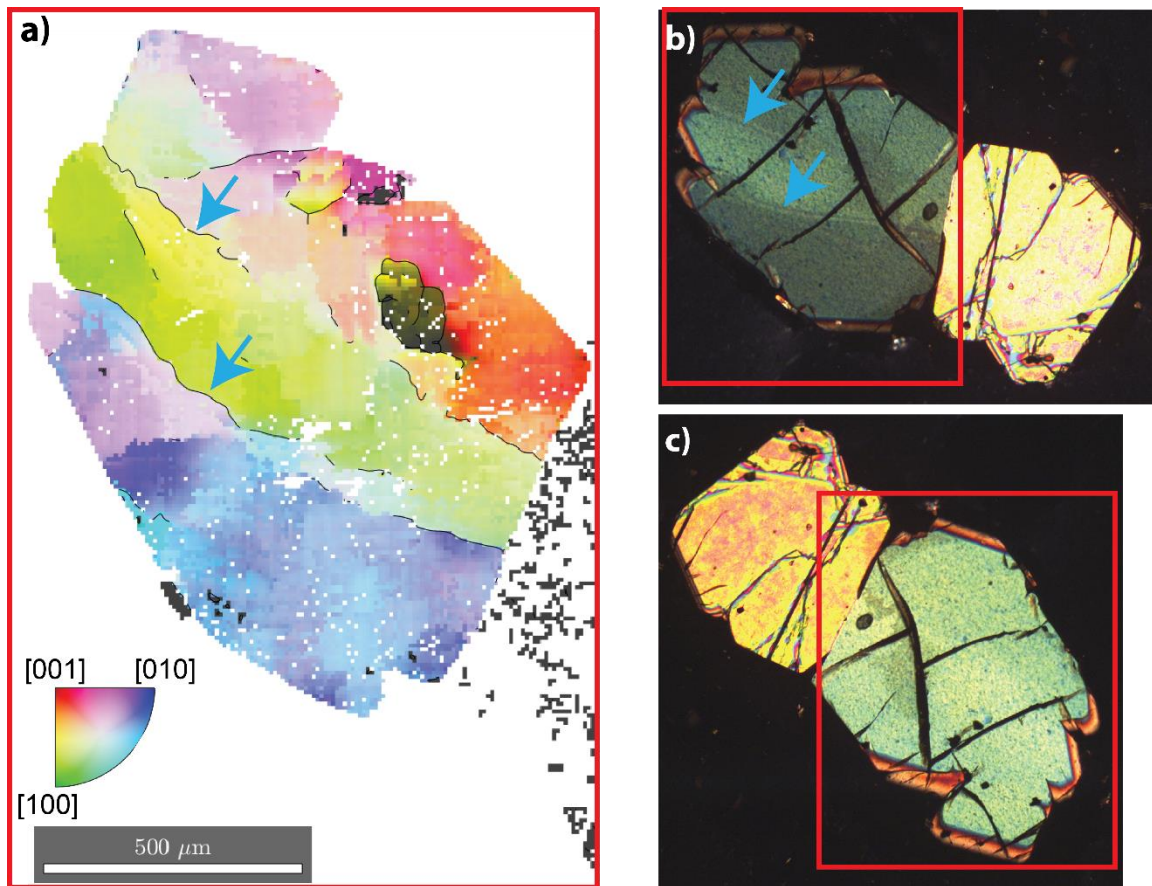

**Supplementary Figure 2**— Comparison of EBSD-derived IPF map (panel **a**; scaled to  $2^\circ$ ) with photos taken using a high-spec optical microscope (panels **b-c**; Zeiss Axioscope A1). The prominent lattice distortions observed in **a**) are almost invisible when viewed with an optical microscope. The two most prominent extinction discontinuities (blue arrows) are only visible when the crystal is within  $4^\circ$  of its extinction position (**b**). In fact, unless the brightness of the microscope is adjusted (as is it in image **b**), it is almost impossible to see these faint color differences.

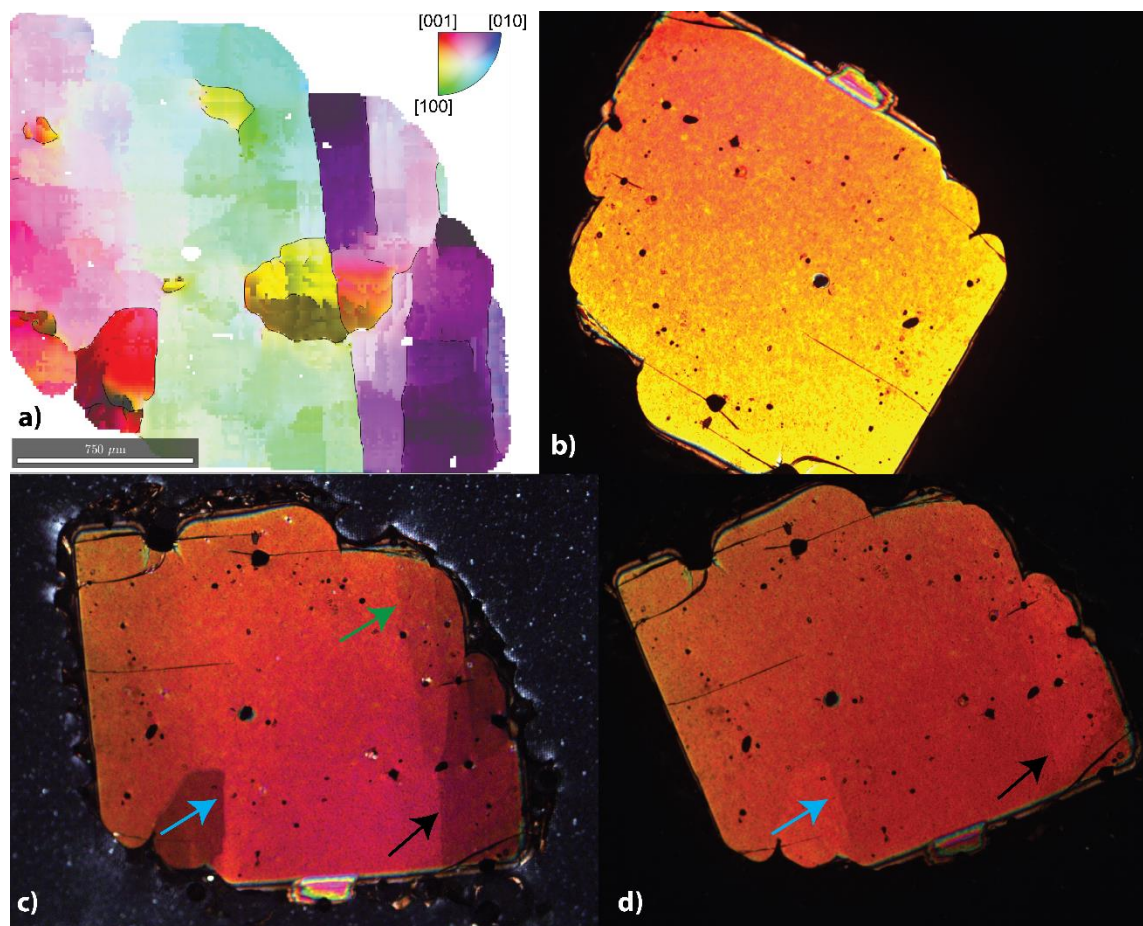

**Supplementary Figure 3**– Comparison of EBSD-derived IPF map (*panel a*; scaled to  $2^\circ$ ) with photos taken using a high-spec optical microscope (*panels b-d*; Zeiss Axioscope A1). The vast majority of low angle boundaries are almost invisible optically (including the prominent transition between green and purple colors in *a*). A few are just visible within  $5^\circ$  of the extinction position (*c*), but only when the brightness of the microscope is turned up.

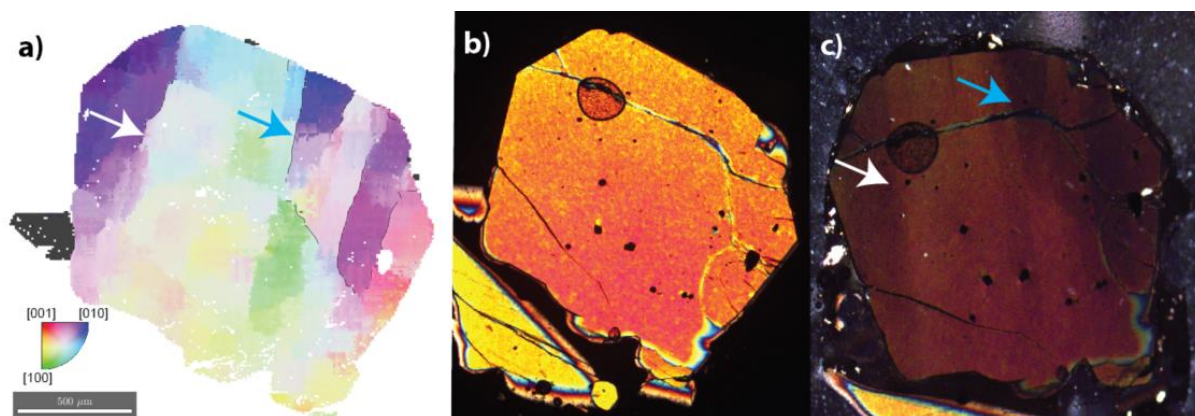

**Supplementary Figure 4**– Comparison of EBSD-derived IPF map (*panel a*; scaled to  $2^\circ$ ) with photos taken using a high-spec optical microscope (*panels b-c*; Zeiss Axioscope A1). Low angle boundaries are visible within  $4^\circ$  of the extinction position (*c*), but only when the brightness of the microscope is turned up to the max, and the brightness is increased dramatically in the imaging software.

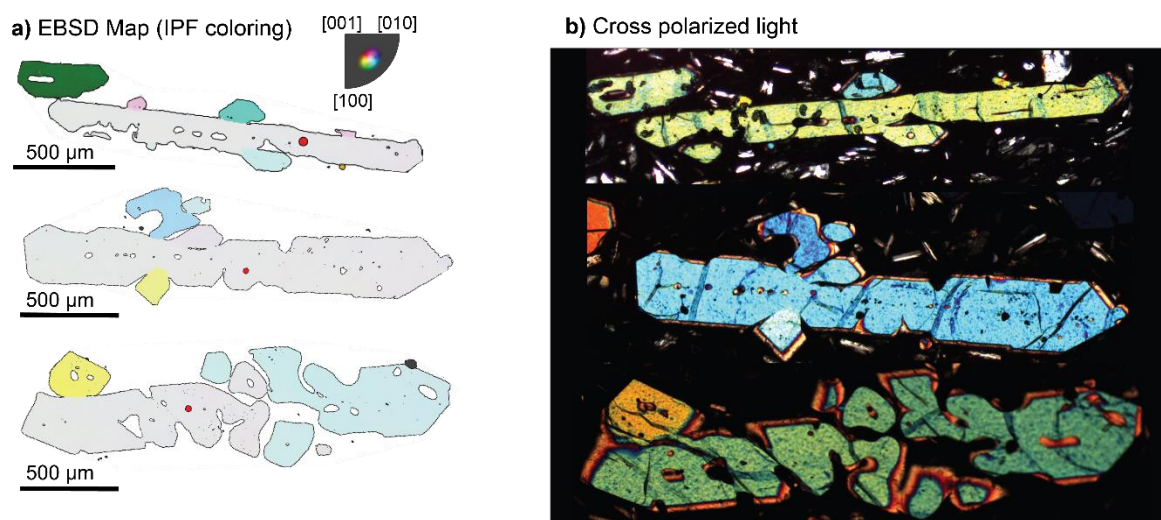

**Supplementary Figure 5**— Comparison of EBSD-derived IPF map (*panel a*; scaled to 20°) with photos taken using a high-spec optical microscope (*panels b-c*; Zeiss AxioScope A1). Optical photographs of dendritic olivines shown in Fig. 3. The subtle differences in orientation between dendritic branches are difficult to spot (e.g. light blue and white colors in between the left hand and right hand parts of the bottom dendrite).

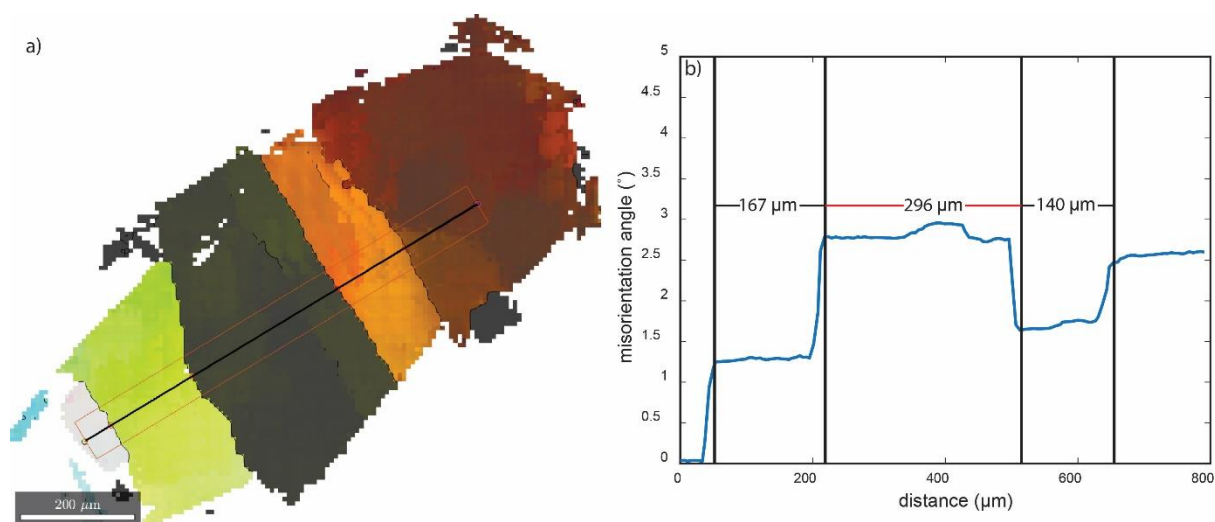

**Supplementary Figure 6**— Example linear intercepts for one grain. **a)** The black line on the IPF-colored EBSD map denotes the user selected profile, chosen to be nearly perpendicular to subgrain boundaries. **b)** Misorientations along the profile, averaged laterally over 5 pixels either side of the boundary to remove noise (code adapted from <https://gist.github.com/kilir/410bab7e3e2777200c5e509f1906d225>). The black lines mark the point at which the low angle boundary is crossed at the centre of the profile.
